# Supplementary material
Source: Elsevier journal article supplement (https://www.sciencedirect.com/science/article/pii/S1134323015000137)
Supplement: mmc1 [file S1134323015000137:mmc1.docx]

**Additional material a**: Odds ratio from logistic regression with which individuals have performed the tests and which patients reached the targets values as dependent variables.

|  | Dependent variable: the test has been performed (yes or no) | | | | Dependent variable: patients have reached the target values (yes or no) | | | |
| --- | --- | --- | --- | --- | --- | --- | --- | --- |
|  | BMI | HbA1c | LDLc | BP | BMI | HbA1c | LDLc | BP |
| Characteristics | OR | OR | OR | OR | OR | OR | OR | OR |
| Sex |  |  |  |  |  |  |  |  |
| Males (ref) | 1.0 | 1.0 | 1.0 | 1.0 | 1.0 | 1.0 | 1.0 | 1.0 |
| Females | 1.1 | 1.2 | 1.1 | 1.1 | 0.7 | 1.0 | 0.9 | **1.0** |
| Age bands |  |  |  |  |  |  |  |  |
| 35-39 (ref) | 1.0 | 1.0 | 1.0 | 1.0 | 1.0 | 1.0 | 1.0 | 1.0 |
| 40-44 | 1.3 | **1.2** | **1.1** | 1.4 | **1.0** | **1.2** | **0.9** | **0.9** |
| 45-49 | 1.7 | 1.3 | 1.2 | 1.8 | 1.3 | 1.2 | **0.9** | **0.9** |
| 50-54 | 2.0 | 1.4 | 1.3 | 2.2 | 1.5 | 1.4 | **1.0** | **1.0** |
| 55-59 | 2.2 | 1.4 | 1.4 | 2.6 | 1.6 | 1.6 | **1.1** | **1.1** |
| 60-64 | 2.7 | 1.6 | 1.6 | 3.1 | 2.0 | 1.7 | 1.3 | 1.3 |
| 65-69 | 3.3 | 1.6 | 1.7 | 4.0 | 2.5 | 1.9 | 1.4 | 1.5 |
| 70-74 | 3.5 | 1.5 | 1.6 | 4.5 | 2.9 | 1.8 | 1.5 | 1.7 |
| 75-79 | 3.1 | 1.3 | 1.5 | 3.9 | 3.0 | 1.6 | 1.5 | 1.6 |
| 80-84 | 2.3 | **1.0** | 1.3 | 3.1 | 3.0 | 1.5 | 1.4 | 1.6 |
| 85+ | **1.1** | 0.6 | 0.8 | 1.6 | 2.2 | **1.1** | **1.0** | 1.3 |

OR means odds ratio. In bold are marked those OR which are not statistically significant at 5%.
